# Supplementary material for: Ambient Temperature and Early Delivery of Singleton Pregnancies
Source: PubMed Central journal article supplement (PMC5332199; doi:10.1289/ehp97), 2016-08-31
Supplement: EHP97.s001.acco.pdf [file EHP97.s001.acco.pdf]

**Note to readers with disabilities:** *EHP* strives to ensure that all journal content is accessible to all readers. However, some figures and Supplemental Material published in *EHP* articles may not conform to [508 standards](#) due to the complexity of the information being presented. If you need assistance accessing journal content, please contact [ehp508@niehs.nih.gov](mailto:ehp508@niehs.nih.gov). Our staff will work with you to assess and meet your accessibility needs within 3 working days.

## **Supplemental Material**

### **Ambient Temperature and Early Delivery of Singleton Pregnancies**

Sandie Ha, Danping Liu, Yeyi Zhu, Sung Soo Kim, Seth Sherman, and Pauline Mendola

#### **Table of Contents**

|          |                                                                                                                               |
|----------|-------------------------------------------------------------------------------------------------------------------------------|
| Table S1 | Distribution of temperature categories by early delivery status                                                               |
| Table S2 | Distributions of site-specific temperature that were used to categorize temperature categories                                |
| Table S3 | Adjusted relative risk of preterm birth associated with average daily ambient temperature by pregnancy windows                |
| Table S4 | Adjusted relative risk of spontaneous preterm birth associated with extreme ambient temperature by pregnancy window           |
| Table S5 | Adjusted relative risk of preterm birth associated with average daily ambient temperature by pregnancy windows and study site |
| Table S6 | Adjusted relative risk of preterm birth associated with extreme whole pregnancy temperature up to week of delivery            |

Table S1. Distribution of temperature categories by early delivery status.

|                               | Early preterm birth<br>( $<34$ weeks) |      | Late preterm birth<br>(34-36 weeks) |      | Early term birth<br>(37-38 weeks) |      | Full term birth<br>( $\geq 39$ weeks) |      |
|-------------------------------|---------------------------------------|------|-------------------------------------|------|-----------------------------------|------|---------------------------------------|------|
|                               | n                                     | %    | n                                   | %    | n                                 | %    | n                                     | %    |
| Chronic exposure <sup>a</sup> |                                       |      |                                     |      |                                   |      |                                       |      |
| Preconception                 |                                       |      |                                     |      |                                   |      |                                       |      |
| Cold                          | 951                                   | 10.9 | 1,636                               | 9.4  | 6,424                             | 9.7  | 13,377                                | 10.2 |
| Mild                          | 7,008                                 | 79.9 | 13,956                              | 80.4 | 53,441                            | 80.3 | 104,233                               | 79.8 |
| Hot                           | 808                                   | 9.2  | 1,771                               | 10.2 | 6,715                             | 10.1 | 13,055                                | 10.0 |
| Weeks 1-7                     |                                       |      |                                     |      |                                   |      |                                       |      |
| Cold                          | 1,043                                 | 11.9 | 1,952                               | 11.2 | 6,876                             | 10.3 | 12,491                                | 9.6  |
| Mild                          | 6,818                                 | 77.8 | 13,571                              | 78.2 | 53,028                            | 79.7 | 105,236                               | 80.5 |
| Hot                           | 906                                   | 10.3 | 1,840                               | 10.6 | 6,676                             | 10.0 | 12,938                                | 9.9  |
| Weeks 8-14                    |                                       |      |                                     |      |                                   |      |                                       |      |
| Cold                          | 872                                   | 10.0 | 1,632                               | 9.4  | 6,510                             | 9.8  | 13,289                                | 10.2 |
| Mild                          | 7,090                                 | 80.9 | 14,047                              | 80.9 | 53,288                            | 80.0 | 104,278                               | 79.8 |
| Hot                           | 805                                   | 9.2  | 1,684                               | 9.7  | 6,782                             | 10.2 | 13,098                                | 10.0 |
| Weeks 15-21                   |                                       |      |                                     |      |                                   |      |                                       |      |
| Cold                          | 839                                   | 9.6  | 1,608                               | 9.3  | 6,501                             | 9.8  | 13,312                                | 10.2 |
| Mild                          | 7,012                                 | 80.0 | 14,002                              | 80.6 | 53,442                            | 80.3 | 104,315                               | 79.8 |
| Hot                           | 916                                   | 10.5 | 1,753                               | 10.1 | 6,637                             | 10.0 | 13,038                                | 10.0 |
| Weeks 22-28                   |                                       |      |                                     |      |                                   |      |                                       |      |
| Cold                          | 845                                   | 9.6  | 1,753                               | 10.1 | 6,511                             | 9.8  | 13,237                                | 10.1 |
| Mild                          | 6,884                                 | 78.5 | 13,804                              | 79.5 | 53,350                            | 80.1 | 104,693                               | 80.1 |
| Hot                           | 1,038                                 | 11.8 | 1,806                               | 10.4 | 6,719                             | 10.1 | 12,735                                | 9.8  |
| Acute exposure <sup>b</sup>   |                                       |      |                                     |      |                                   |      |                                       |      |
| Cold season (Oct-Apr)         | 48.9                                  | 17.2 | 47.8                                | 16.3 | 47.0                              | 15.9 | 47.7 <sup>c</sup>                     | 16.4 |
| Warm season (May-Sept)        | 71.2                                  | 9.5  | 70.6                                | 9.1  | 70.4                              | 8.8  | 70.0 <sup>c</sup>                     | 9.6  |

<sup>a</sup>The distribution is presented as frequency (percent). Cold, mild and hot were defined as  $<10^{\text{th}}$ ,  $10\text{-}90^{\text{th}}$ , and  $>90^{\text{th}}$  percentile of the distribution of temperature by site.

<sup>b</sup>The distribution is presented as mean (standard deviation) expressed in °F. Estimates are based on 87,832 first preterm births.

<sup>c</sup>Season-specific average daily temperature during control periods.

Table S2. Distribution of site-specific absolute temperature that was used to categorize temperature categories.

| Pregnancy window | Site                                           | Daily average temperature distribution (°F) |      |      |      |      |      |      |
|------------------|------------------------------------------------|---------------------------------------------|------|------|------|------|------|------|
|                  |                                                | Min                                         | P5   | P10  | P50  | P90  | P95  | Max  |
| Preconception    | 1-Baystate Medical Center, Massachusetts       | 19.9                                        | 23.6 | 27.4 | 50.4 | 66.7 | 67.8 | 68.9 |
|                  | 2-Cedars-Sinai Medical Center, California      | 54.6                                        | 55.7 | 56.3 | 64.7 | 71.8 | 73.2 | 75.6 |
|                  | 3-Christiana Care Health System, Delaware      | 33.4                                        | 35.7 | 38.0 | 57.7 | 75.6 | 76.5 | 77.0 |
|                  | 4-Indiana University - Clarian Health, Indiana | 31.1                                        | 34.2 | 35.0 | 56.7 | 71.6 | 72.5 | 73.6 |
|                  | 5-Intermountain HealthCare, Utah               | 24.4                                        | 29.1 | 31.3 | 52.0 | 67.5 | 68.9 | 72.0 |
|                  | 6-Maimonides Medical Center, New York          | 27.8                                        | 31.5 | 34.4 | 56.8 | 73.9 | 74.8 | 75.7 |
|                  | 7-MedStar Health, Maryland                     | 32.2                                        | 35.6 | 37.8 | 57.9 | 73.5 | 74.3 | 76.0 |
|                  | 8-MetroHealth Medical Center, Ohio             | 28.9                                        | 30.6 | 32.0 | 50.7 | 68.5 | 69.4 | 70.7 |
|                  | 9-Summa Health System, Ohio                    | 26.4                                        | 30.1 | 32.5 | 53.6 | 67.9 | 68.7 | 70.5 |
|                  | 10-University of Illinois at Chicago, Illinois | 26.0                                        | 29.0 | 31.2 | 47.7 | 66.5 | 68.3 | 70.9 |
|                  | 11-University of Miami, Florida                | 68.7                                        | 69.6 | 70.1 | 77.1 | 83.3 | 83.5 | 84.3 |
|                  | 12-University of Texas, Texas                  | 55.2                                        | 57.0 | 58.7 | 72.7 | 82.2 | 82.5 | 83.6 |
| Weeks 1-7        | 1-Baystate Medical Center, Massachusetts       | 14.1                                        | 20.5 | 25.4 | 48.7 | 67.4 | 68.7 | 70.6 |
|                  | 2-Cedars-Sinai Medical Center, California      | 44.6                                        | 46.7 | 47.9 | 60.5 | 74.7 | 76.9 | 79.4 |
|                  | 3-Christiana Care Health System, Delaware      | 28.9                                        | 33.1 | 37.1 | 53.9 | 75.8 | 77.4 | 77.9 |
|                  | 4-Indiana University - Clarian Health, Indiana | 24.3                                        | 31.3 | 33.1 | 51.0 | 71.1 | 73.1 | 74.0 |
|                  | 5-Intermountain HealthCare, Utah               | 19.6                                        | 26.0 | 27.8 | 50.9 | 70.6 | 72.0 | 77.1 |
|                  | 6-Maimonides Medical Center, New York          | 23.4                                        | 29.7 | 34.0 | 56.1 | 75.0 | 76.7 | 77.5 |
|                  | 7-MedStar Health, Maryland                     | 28.9                                        | 34.5 | 37.7 | 56.9 | 73.2 | 74.8 | 76.6 |
|                  | 8-MetroHealth Medical Center, Ohio             | 22.0                                        | 26.9 | 31.6 | 47.9 | 69.7 | 70.6 | 71.7 |
|                  | 9-Summa Health System, Ohio                    | 22.2                                        | 27.7 | 31.1 | 52.4 | 68.7 | 70.7 | 72.3 |
|                  | 10-University of Illinois at Chicago, Illinois | 22.8                                        | 27.1 | 29.6 | 45.6 | 68.4 | 70.6 | 72.7 |
|                  | 11-University of Miami, Florida                | 67.9                                        | 69.3 | 69.9 | 76.4 | 83.4 | 83.7 | 84.2 |
|                  | 12-University of Texas, Texas                  | 51.0                                        | 53.2 | 54.5 | 69.4 | 80.5 | 81.1 | 82.6 |
| Weeks 8-14       | 1-Baystate Medical Center, Massachusetts       | 14.4                                        | 19.7 | 23.0 | 46.5 | 67.3 | 68.6 | 70.6 |
|                  | 2-Cedars-Sinai Medical Center, California      | 44.6                                        | 46.6 | 47.6 | 58.1 | 74.4 | 76.9 | 79.3 |
|                  | 3-Christiana Care Health System, Delaware      | 29.1                                        | 32.3 | 34.4 | 54.4 | 75.9 | 77.5 | 77.9 |
|                  | 4-Indiana University - Clarian Health, Indiana | 24.2                                        | 29.2 | 31.8 | 49.0 | 71.6 | 73.2 | 73.9 |
|                  | 5-Intermountain HealthCare, Utah               | 19.6                                        | 25.0 | 27.4 | 45.7 | 70.3 | 71.9 | 77.0 |
|                  | 6-Maimonides Medical Center, New York          | 23.7                                        | 29.0 | 31.9 | 54.3 | 75.0 | 76.7 | 77.5 |
|                  | 7-MedStar Health, Maryland                     | 29.1                                        | 33.0 | 36.4 | 55.5 | 73.3 | 74.8 | 76.6 |
|                  | 8-MetroHealth Medical Center, Ohio             | 22.1                                        | 26.7 | 31.8 | 48.3 | 67.7 | 70.1 | 71.1 |
|                  | 9-Summa Health System, Ohio                    | 21.8                                        | 25.6 | 28.6 | 49.6 | 68.6 | 70.7 | 72.2 |
|                  | 10-University of Illinois at Chicago, Illinois | 22.8                                        | 25.8 | 28.6 | 44.5 | 68.5 | 70.5 | 72.7 |
|                  | 11-University of Miami, Florida                | 67.9                                        | 69.2 | 69.8 | 76.7 | 83.4 | 83.7 | 84.2 |
|                  | 12-University of Texas, Texas                  | 51.1                                        | 53.0 | 54.3 | 68.9 | 80.6 | 81.0 | 82.6 |
| Weeks 15-21      | 1-Baystate Medical Center, Massachusetts       | 14.4                                        | 19.9 | 23.2 | 45.3 | 66.9 | 68.6 | 70.6 |
|                  | 2-Cedars-Sinai Medical Center, California      | 44.6                                        | 46.7 | 47.7 | 57.2 | 74.3 | 76.8 | 79.3 |
|                  | 3-Christiana Care Health System, Delaware      | 29.1                                        | 34.5 | 37.5 | 55.8 | 75.6 | 77.4 | 77.9 |
|                  | 4-Indiana University - Clarian Health, Indiana | 24.2                                        | 29.8 | 32.5 | 50.5 | 72.5 | 73.3 | 73.9 |
|                  | 5-Intermountain HealthCare, Utah               | 19.6                                        | 24.5 | 27.2 | 44.1 | 69.0 | 71.6 | 79.5 |
|                  | 6-Maimonides Medical Center, New York          | 23.7                                        | 29.0 | 31.9 | 52.8 | 74.5 | 76.4 | 77.5 |
|                  | 7-MedStar Health, Maryland                     | 29.1                                        | 32.9 | 36.4 | 54.0 | 73.3 | 74.8 | 76.6 |
|                  | 8-MetroHealth Medical Center, Ohio             | 22.1                                        | 25.7 | 31.6 | 48.5 | 68.5 | 69.9 | 71.0 |
|                  | 9-Summa Health System, Ohio                    | 21.8                                        | 25.8 | 28.9 | 47.6 | 68.5 | 70.7 | 72.2 |
|                  | 10-University of Illinois at Chicago, Illinois | 22.8                                        | 25.8 | 28.8 | 44.5 | 68.2 | 70.5 | 72.7 |

|             |                                                |      |      |      |      |      |      |      |
|-------------|------------------------------------------------|------|------|------|------|------|------|------|
|             | 11-University of Miami, Florida                | 67.9 | 69.3 | 70.0 | 77.1 | 83.5 | 83.8 | 84.2 |
|             | 12-University of Texas, Texas                  | 51.1 | 53.1 | 54.5 | 68.9 | 80.5 | 80.9 | 82.2 |
| Weeks 22-28 | 1-Baystate Medical Center, Massachusetts       | 14.4 | 19.9 | 23.1 | 45.7 | 66.9 | 68.6 | 71.3 |
|             | 2-Cedars-Sinai Medical Center, California      | 43.5 | 46.6 | 47.7 | 57.7 | 74.4 | 76.9 | 80.5 |
|             | 3-Christiana Care Health System, Delaware      | 29.7 | 37.1 | 38.0 | 58.0 | 75.8 | 77.4 | 78.7 |
|             | 4-Indiana University - Clarian Health, Indiana | 24.2 | 30.7 | 33.5 | 55.6 | 72.5 | 73.3 | 76.1 |
|             | 5-Intermountain HealthCare, Utah               | 19.0 | 24.8 | 27.4 | 44.3 | 69.3 | 71.7 | 79.5 |
|             | 6-Maimonides Medical Center, New York          | 23.7 | 29.0 | 31.9 | 53.8 | 74.3 | 76.1 | 77.7 |
|             | 7-MedStar Health, Maryland                     | 26.4 | 33.0 | 36.5 | 54.2 | 72.9 | 74.8 | 76.8 |
|             | 8-MetroHealth Medical Center, Ohio             | 18.3 | 26.9 | 31.8 | 51.1 | 68.4 | 69.5 | 72.7 |
|             | 9-Summa Health System, Ohio                    | 21.8 | 25.8 | 29.0 | 48.2 | 68.8 | 70.7 | 73.0 |
|             | 10-University of Illinois at Chicago, Illinois | 20.1 | 26.1 | 29.2 | 45.6 | 68.4 | 70.6 | 73.4 |
|             | 11-University of Miami, Florida                | 66.9 | 69.4 | 70.1 | 77.4 | 83.6 | 83.8 | 84.6 |
|             | 12-University of Texas, Texas                  | 49.6 | 53.1 | 54.7 | 69.6 | 80.5 | 81.0 | 82.4 |

Table S3. Adjusted<sup>a</sup> relative risk of preterm birth associated with extreme ambient temperature by pregnancy windows.

| Pregnancy windows      | Early preterm birth (<34 weeks) |                     | Late preterm birth (34-36 weeks) |                     | Early term birth (37-38 weeks) |                     |
|------------------------|---------------------------------|---------------------|----------------------------------|---------------------|--------------------------------|---------------------|
|                        | RR                              | (95% CI)            | RR                               | (95% CI)            | RR                             | (95% CI)            |
| <b>Cold</b>            |                                 |                     |                                  |                     |                                |                     |
| 3 months preconception | 1.00                            | (0.92, 1.09)        | <b>0.92</b>                      | <b>(0.86, 0.98)</b> | <b>0.95</b>                    | <b>(0.92, 0.97)</b> |
| Weeks 1-7              | <b>1.20</b>                     | <b>(1.11, 1.30)</b> | <b>1.09</b>                      | <b>(1.04, 1.15)</b> | <b>1.03</b>                    | <b>(1.00, 1.05)</b> |
| Weeks 8-14             | 0.97                            | (0.90, 1.05)        | <b>0.92</b>                      | <b>(0.87, 0.98)</b> | <b>0.95</b>                    | <b>(0.93, 0.98)</b> |
| Weeks 15-21            | 1.00                            | (0.92, 1.09)        | 0.94                             | (0.89, 1.00)        | 0.97                           | (0.95, 1.00)        |
| Weeks 22-28            | 0.94                            | (0.86, 1.03)        | 0.97                             | (0.92, 1.03)        | <b>0.96</b>                    | <b>(0.93, 0.98)</b> |
| <b>Hot</b>             |                                 |                     |                                  |                     |                                |                     |
| 3 months preconception | 1.01                            | (0.92, 1.10)        | <b>1.09</b>                      | <b>(1.02, 1.16)</b> | 1.03                           | (1.00, 1.05)        |
| Weeks 1-7              | <b>1.11</b>                     | <b>(1.01, 1.21)</b> | 1.05                             | (0.99, 1.11)        | <b>1.04</b>                    | <b>(1.02, 1.07)</b> |
| Weeks 8-14             | 1.06                            | (0.96, 1.17)        | 1.01                             | (0.94, 1.08)        | <b>1.04</b>                    | <b>(1.01, 1.07)</b> |
| Weeks 15-21            | <b>1.18</b>                     | <b>(1.07, 1.29)</b> | <b>1.18</b>                      | <b>(1.11, 1.27)</b> | <b>1.04</b>                    | <b>(1.01, 1.07)</b> |
| Weeks 22-28            | 1.08                            | (0.98, 1.19)        | 1.00                             | (0.93, 1.07)        | 1.03                           | (0.99, 1.06)        |

Bold face indicates statistical significance at alpha<0.05

Abbreviations: aRR, adjusted relative risk; CI, confidence interval

<sup>a</sup>Model adjusted for all covariates in Table 1, humidity, and study site.

Table S4. Adjusted<sup>a</sup> relative risk of spontaneous preterm birth associated with extreme ambient temperature by pregnancy window.

| Pregnancy windows      | Early preterm birth (<34 weeks) |                     | Late preterm birth (34-36 weeks) |                     | Early term birth (37-38 weeks) |                     |
|------------------------|---------------------------------|---------------------|----------------------------------|---------------------|--------------------------------|---------------------|
|                        | RR                              | (95% CI)            | RR                               | (95% CI)            | RR                             | (95% CI)            |
| <b>Cold</b>            |                                 |                     |                                  |                     |                                |                     |
| 3 months preconception | 1.06                            | (0.96, 1.16)        | <b>0.87</b>                      | <b>(0.81, 0.94)</b> | <b>0.93</b>                    | <b>(0.90, 0.96)</b> |
| Weeks 1-7              | <b>1.21</b>                     | <b>(1.09, 1.33)</b> | <b>1.10</b>                      | <b>(1.03, 1.18)</b> | 1.02                           | (0.99, 1.05)        |
| Weeks 8-14             | 0.97                            | (0.88, 1.07)        | 0.93                             | (0.87, 1.00)        | 0.97                           | (0.94, 1.00)        |
| Weeks 15-21            | 1.01                            | (0.91, 1.11)        | <b>0.92</b>                      | <b>(0.85, 0.98)</b> | 0.97                           | (0.94, 1.00)        |
| Weeks 22-28            | 0.97                            | (0.87, 1.07)        | 0.94                             | (0.88, 1.01)        | 0.97                           | (0.94, 1.00)        |
| <b>Hot</b>             |                                 |                     |                                  |                     |                                |                     |
| 3 months preconception | 0.93                            | (0.84, 1.03)        | 1.04                             | (0.97, 1.11)        | <b>1.03</b>                    | <b>(1.00, 1.06)</b> |
| Weeks 1-7              | <b>1.11</b>                     | <b>(1.00, 1.24)</b> | <b>1.11</b>                      | <b>(1.03, 1.19)</b> | <b>1.04</b>                    | <b>(1.01, 1.08)</b> |
| Weeks 8-14             | 0.98                            | (0.88, 1.08)        | 1.01                             | (0.94, 1.09)        | 1.02                           | (0.99, 1.06)        |
| Weeks 15-21            | <b>1.22</b>                     | <b>(1.10, 1.37)</b> | <b>1.15</b>                      | <b>(1.07, 1.24)</b> | 1.02                           | (0.99, 1.05)        |
| Weeks 22-28            | <b>1.15</b>                     | <b>(1.04, 1.27)</b> | 0.99                             | (0.92, 1.06)        | 0.99                           | (0.96, 1.03)        |

Bold face indicates statistical significance at alpha<0.05

Abbreviations: aRR, adjusted relative risk; CI, confidence interval

<sup>a</sup>Model adjusted for all covariates in Table 1, humidity, and study site.

Table S5. Relative risk of preterm birth associated with extreme ambient temperature by pregnancy windows and site.

| Site                                      | Temperature | Pregnancy windows      | Early preterm birth (<34 weeks) | Late preterm birth (34-36 weeks) | Early term birth (37-38 weeks) |
|-------------------------------------------|-------------|------------------------|---------------------------------|----------------------------------|--------------------------------|
|                                           |             |                        | RR (95% CI)                     | RR (95% CI)                      | RR (95% CI)                    |
| 1-Baystate Medical Center, Massachusetts  | Cold        | 3 months preconception | 1.06 (0.78, 1.43)               | 1.05 (0.85, 1.31)                | 1.04 (0.94, 1.14)              |
|                                           |             | Weeks 1-7              | <b>1.63 (1.18, 2.24)</b>        | 1.17 (0.95, 1.44)                | 1.05 (0.96, 1.16)              |
|                                           |             | Weeks 8-14             | 1.09 (0.81, 1.45)               | 0.99 (0.80, 1.21)                | 0.99 (0.90, 1.09)              |
|                                           |             | Weeks 15-21            | 1.09 (0.81, 1.46)               | 0.91 (0.72, 1.14)                | 0.98 (0.89, 1.08)              |
|                                           |             | Weeks 22-28            | 0.83 (0.62, 1.11)               | 0.92 (0.74, 1.15)                | 1.01 (0.92, 1.11)              |
|                                           | Hot         | 3 months preconception | 0.79 (0.57, 1.10)               | 1.00 (0.78, 1.28)                | 0.99 (0.89, 1.10)              |
|                                           |             | Weeks 1-7              | 1.37 (0.98, 1.92)               | 1.17 (0.92, 1.48)                | 1.07 (0.96, 1.19)              |
|                                           |             | Weeks 8-14             | 1.06 (0.76, 1.47)               | 1.16 (0.92, 1.45)                | 1.01 (0.91, 1.13)              |
|                                           |             | Weeks 15-21            | 0.83 (0.59, 1.18)               | 0.96 (0.73, 1.25)                | 0.93 (0.82, 1.04)              |
|                                           |             | Weeks 22-28            | 0.80 (0.55, 1.16)               | 0.93 (0.72, 1.21)                | 0.94 (0.84, 1.05)              |
| 2-Cedars-Sinai Medical Center, California | Cold        | 3 months preconception | 1.35 (0.87, 2.10)               | 1.16 (0.91, 1.49)                | 1.04 (0.95, 1.15)              |
|                                           |             | Weeks 1-7              | 1.21 (0.79, 1.85)               | <b>1.70 (1.33, 2.17)</b>         | <b>1.16 (1.06, 1.27)</b>       |
|                                           |             | Weeks 8-14             | 0.84 (0.58, 1.23)               | 1.04 (0.83, 1.30)                | 0.90 (0.82, 1.00)              |
|                                           |             | Weeks 15-21            | 0.92 (0.63, 1.35)               | 0.98 (0.78, 1.22)                | 1.02 (0.93, 1.12)              |
|                                           |             | Weeks 22-28            | 0.86 (0.57, 1.29)               | 1.10 (0.88, 1.37)                | 1.01 (0.92, 1.11)              |
|                                           | Hot         | 3 months preconception | 0.78 (0.51, 1.19)               | 0.89 (0.69, 1.14)                | 1.00 (0.90, 1.10)              |
|                                           |             | Weeks 1-7              | 1.48 (0.91, 2.40)               | 0.91 (0.71, 1.18)                | 1.00 (0.90, 1.13)              |
|                                           |             | Weeks 8-14             | 1.53 (0.95, 2.45)               | 1.13 (0.85, 1.52)                | 1.07 (0.96, 1.20)              |
|                                           |             | Weeks 15-21            | 1.33 (0.80, 2.22)               | 1.37 (0.99, 1.89)                | 1.09 (0.96, 1.24)              |
|                                           |             | Weeks 22-28            | <b>0.45 (0.21, 0.98)</b>        | 0.42 (0.28, 0.64)                | 0.85 (0.71, 1.02)              |
| 3-Christiana Care Health System, Delaware | Cold        | 3 months preconception | 0.68 (0.42, 1.12)               | 1.24 (0.91, 1.69)                | 0.93 (0.81, 1.06)              |
|                                           |             | Weeks 1-7              | 1.11 (0.73, 1.68)               | 1.21 (0.95, 1.55)                | 1.09 (0.98, 1.21)              |
|                                           |             | Weeks 8-14             | <b>0.30 (0.16, 0.54)</b>        | 0.83 (0.62, 1.11)                | 0.93 (0.83, 1.04)              |
|                                           |             | Weeks 15-21            | 1.03 (0.67, 1.58)               | <b>0.64 (0.46, 0.88)</b>         | 0.97 (0.86, 1.09)              |
|                                           |             | Weeks 22-28            | 1.04 (0.71, 1.53)               | 0.84 (0.66, 1.07)                | <b>0.88 (0.78, 0.98)</b>       |
|                                           | Hot         | 3 months preconception | 1.10 (0.62, 1.94)               | 0.85 (0.58, 1.25)                | 1.02 (0.86, 1.22)              |
|                                           |             | Weeks 1-7              | 1.37 (0.84, 2.22)               | <b>0.73 (0.54, 0.99)</b>         | 1.05 (0.93, 1.20)              |
|                                           |             | Weeks 8-14             | 0.53 (0.27, 1.03)               | 1.08 (0.72, 1.60)                | 0.98 (0.83, 1.15)              |
|                                           |             | Weeks 15-21            | 0.93 (0.59, 1.46)               | 1.14 (0.84, 1.53)                | 1.05 (0.92, 1.20)              |
|                                           |             | Weeks 22-28            | 0.63 (0.37, 1.08)               | 0.74 (0.55, 1.00)                | 1.05 (0.91, 1.21)              |
| 4-Indiana                                 | Cold        | 3 months preconception | 0.66 (0.36, 1.21)               | 1.31 (0.87, 1.98)                | 0.92 (0.75, 1.11)              |

|                                                |                                  |                        |                          |                          |                          |                   |
|------------------------------------------------|----------------------------------|------------------------|--------------------------|--------------------------|--------------------------|-------------------|
| University -<br>Clarian Health,<br>Indiana     |                                  | Weeks 1-7              | 1.27 (0.64, 2.50)        | 1.13 (0.82, 1.55)        | 1.05 (0.90, 1.22)        |                   |
|                                                |                                  | Weeks 8-14             | 0.64 (0.31, 1.33)        | <b>0.66 (0.48, 0.91)</b> | <b>0.80 (0.69, 0.94)</b> |                   |
|                                                |                                  | Weeks 15-21            | 1.42 (0.75, 2.69)        | 0.89 (0.60, 1.33)        | 0.95 (0.80, 1.13)        |                   |
|                                                |                                  | Weeks 22-28            | 0.46 (0.19, 1.11)        | 0.70 (0.46, 1.08)        | 0.88 (0.75, 1.05)        |                   |
| 5-<br>Intermountain<br>HealthCare,<br>Utah     | Hot                              | 3 months preconception | 1.80 (0.91, 3.55)        | 1.29 (0.86, 1.95)        | 1.01 (0.86, 1.19)        |                   |
|                                                |                                  | Weeks 1-7              | 1.47 (0.54, 4.00)        | 0.77 (0.47, 1.28)        | <b>1.34 (1.03, 1.75)</b> |                   |
|                                                |                                  | Weeks 8-14             | 1.33 (0.57, 3.13)        | 0.92 (0.51, 1.64)        | 1.10 (0.87, 1.39)        |                   |
|                                                |                                  | Weeks 15-21            | 0.67 (0.36, 1.24)        | 1.27 (0.82, 1.97)        | 1.10 (0.91, 1.34)        |                   |
|                                                | Cold                             | 3 months preconception | 1.34 (0.70, 2.58)        | 0.82 (0.56, 1.21)        | 0.98 (0.80, 1.19)        |                   |
|                                                |                                  | Weeks 1-7              | 1.16 (0.84, 1.60)        | 0.84 (0.71, 1.00)        | <b>0.88 (0.82, 0.94)</b> |                   |
|                                                |                                  | Weeks 8-14             | 1.01 (0.82, 1.25)        | 1.08 (0.96, 1.22)        | 1.04 (0.98, 1.09)        |                   |
|                                                |                                  | Weeks 15-21            | 0.93 (0.74, 1.18)        | 0.87 (0.76, 1.00)        | 0.95 (0.90, 1.00)        |                   |
|                                                | Hot                              | 3 months preconception | 0.90 (0.71, 1.15)        | 1.00 (0.87, 1.14)        | 0.95 (0.90, 1.00)        |                   |
|                                                |                                  | Weeks 22-28            | 1.02 (0.78, 1.34)        | 1.02 (0.89, 1.17)        | <b>0.92 (0.87, 0.97)</b> |                   |
|                                                |                                  | 3 months preconception | 1.11 (0.85, 1.46)        | 1.10 (0.94, 1.28)        | 1.04 (0.98, 1.10)        |                   |
|                                                |                                  | Weeks 1-7              | <b>1.58 (1.19, 2.09)</b> | <b>1.26 (1.09, 1.46)</b> | <b>1.10 (1.04, 1.17)</b> |                   |
| 6-Maimonides<br>Medical<br>Center, New<br>York | Cold                             | 3 months preconception | <b>1.44 (1.02, 2.04)</b> | <b>1.27 (1.06, 1.52)</b> | <b>1.12 (1.05, 1.20)</b> |                   |
|                                                |                                  | Weeks 8-14             | <b>1.73 (1.23, 2.42)</b> | <b>1.29 (1.06, 1.58)</b> | 1.06 (0.97, 1.15)        |                   |
|                                                |                                  | Weeks 15-21            | <b>1.81 (1.17, 2.80)</b> | <b>1.39 (1.12, 1.73)</b> | <b>1.14 (1.04, 1.25)</b> |                   |
|                                                |                                  | Weeks 22-28            | 0.78 (0.50, 1.23)        | <b>0.59 (0.44, 0.79)</b> | 0.92 (0.82, 1.03)        |                   |
|                                                | Hot                              | 3 months preconception | 0.86 (0.55, 1.34)        | 1.03 (0.80, 1.33)        | 0.95 (0.86, 1.05)        |                   |
|                                                |                                  | Weeks 1-7              | 1.22 (0.77, 1.91)        | 0.92 (0.72, 1.18)        | 0.96 (0.87, 1.06)        |                   |
|                                                |                                  | Weeks 8-14             | 0.74 (0.43, 1.25)        | 1.03 (0.78, 1.36)        | 1.00 (0.90, 1.12)        |                   |
|                                                |                                  | Weeks 15-21            | 1.22 (0.77, 1.93)        | 1.19 (0.91, 1.54)        | 1.07 (0.96, 1.18)        |                   |
|                                                | 7-MedStar<br>Health,<br>Maryland | Cold                   | 3 months preconception   | 1.23 (0.75, 2.03)        | 0.96 (0.71, 1.31)        | 1.04 (0.92, 1.17) |
|                                                |                                  |                        | Weeks 1-7                | 0.87 (0.53, 1.41)        | 1.20 (0.88, 1.62)        | 1.00 (0.89, 1.13) |
|                                                |                                  |                        | Weeks 8-14               | 0.83 (0.47, 1.47)        | <b>0.74 (0.56, 0.99)</b> | 1.05 (0.93, 1.17) |
|                                                |                                  |                        | Weeks 15-21              | 0.72 (0.41, 1.25)        | 1.05 (0.73, 1.49)        | 0.95 (0.84, 1.09) |
| Hot                                            |                                  | 3 months preconception | 0.68 (0.35, 1.30)        | 0.80 (0.60, 1.08)        | 1.00 (0.88, 1.14)        |                   |
|                                                |                                  | Weeks 22-28            | <b>0.42 (0.31, 0.57)</b> | <b>0.70 (0.57, 0.86)</b> | 0.95 (0.87, 1.03)        |                   |
|                                                |                                  | Weeks 1-7              | <b>1.55 (1.25, 1.92)</b> | <b>1.38 (1.18, 1.62)</b> | <b>1.11 (1.03, 1.19)</b> |                   |
|                                                |                                  | Weeks 8-14             | 0.95 (0.73, 1.23)        | 0.96 (0.81, 1.15)        | 0.97 (0.90, 1.05)        |                   |
| Cold                                           |                                  | 3 months preconception | 0.85 (0.63, 1.14)        | 1.00 (0.83, 1.20)        | 0.94 (0.87, 1.03)        |                   |
|                                                |                                  | Weeks 15-21            | 1.08 (0.83, 1.40)        | 1.05 (0.89, 1.24)        | 0.94 (0.87, 1.01)        |                   |
|                                                |                                  | 3 months preconception | 1.05 (0.78, 1.43)        | <b>1.36 (1.13, 1.64)</b> | <b>1.12 (1.02, 1.22)</b> |                   |
|                                                |                                  | Weeks 1-7              | 1.14 (0.86, 1.50)        | 1.19 (0.99, 1.43)        | <b>1.13 (1.03, 1.23)</b> |                   |



|                                                         |      |                        |             |                          |                          |                          |                          |
|---------------------------------------------------------|------|------------------------|-------------|--------------------------|--------------------------|--------------------------|--------------------------|
| 8-MetroHealth<br>Medical<br>Center, Ohio                | Cold | 3 months preconception | Weeks 8-14  | 1.01 (0.76, 1.34)        | 1.04 (0.85, 1.27)        | <b>1.08 (1.00, 1.18)</b> |                          |
|                                                         |      |                        | Weeks 15-21 | <b>2.21 (1.62, 3.02)</b> | 1.18 (0.96, 1.45)        | 1.08 (0.99, 1.18)        |                          |
|                                                         |      |                        | Weeks 22-28 | 0.81 (0.59, 1.13)        | <b>0.77 (0.62, 0.96)</b> | 0.97 (0.87, 1.08)        |                          |
|                                                         |      |                        | Weeks 1-7   | 1.02 (0.68, 1.54)        | 1.04 (0.78, 1.37)        | 1.02 (0.87, 1.18)        |                          |
|                                                         |      |                        | Weeks 8-14  | 0.88 (0.57, 1.35)        | 0.95 (0.70, 1.28)        | 0.96 (0.82, 1.12)        |                          |
|                                                         |      |                        | Weeks 15-21 | 1.19 (0.77, 1.85)        | 1.15 (0.86, 1.53)        | 1.13 (0.97, 1.33)        |                          |
|                                                         |      |                        | Weeks 22-28 | 1.16 (0.75, 1.78)        | 0.88 (0.65, 1.20)        | 1.13 (0.97, 1.32)        |                          |
|                                                         |      |                        | Hot         | 3 months preconception   | 0.91 (0.57, 1.45)        | 1.14 (0.82, 1.58)        | 0.98 (0.82, 1.16)        |
|                                                         |      |                        | Weeks 1-7   | <b>0.29 (0.17, 0.49)</b> | 1.08 (0.74, 1.56)        | <b>0.78 (0.64, 0.94)</b> |                          |
|                                                         |      |                        | Weeks 8-14  | 0.56 (0.26, 1.20)        | <b>0.37 (0.21, 0.63)</b> | <b>0.71 (0.57, 0.89)</b> |                          |
| 9-Summa<br>Health<br>System, Ohio                       | Cold | 3 months preconception | Weeks 15-21 | 1.22 (0.74, 2.01)        | 0.97 (0.67, 1.39)        | 0.96 (0.79, 1.18)        |                          |
|                                                         |      |                        | Weeks 22-28 | 1.45 (0.87, 2.42)        | 0.77 (0.54, 1.10)        | 1.05 (0.86, 1.29)        |                          |
|                                                         |      |                        | Weeks 1-7   | 1.14 (0.73, 1.79)        | 1.35 (0.98, 1.87)        | 0.99 (0.85, 1.15)        |                          |
|                                                         |      |                        | Weeks 8-14  | 1.30 (0.81, 2.09)        | 1.05 (0.75, 1.46)        | 1.00 (0.86, 1.15)        |                          |
|                                                         |      |                        | Weeks 15-21 | 1.07 (0.62, 1.84)        | 0.72 (0.50, 1.03)        | 1.11 (0.94, 1.31)        |                          |
|                                                         |      |                        | Weeks 22-28 | 0.94 (0.55, 1.61)        | 1.05 (0.76, 1.45)        | 1.02 (0.88, 1.19)        |                          |
|                                                         |      |                        | Hot         | 3 months preconception   | 0.97 (0.62, 1.51)        | 1.08 (0.81, 1.45)        | <b>0.82 (0.71, 0.94)</b> |
|                                                         |      |                        | Weeks 1-7   | 0.93 (0.59, 1.46)        | 0.83 (0.62, 1.10)        | 0.87 (0.75, 1.00)        |                          |
|                                                         |      |                        | Weeks 8-14  | <b>2.54 (1.52, 4.26)</b> | 1.03 (0.72, 1.47)        | 1.07 (0.92, 1.25)        |                          |
|                                                         |      |                        | Weeks 15-21 | 0.85 (0.50, 1.44)        | <b>1.60 (1.08, 2.35)</b> | 1.15 (0.98, 1.36)        |                          |
| 10-University<br>of Illinois at<br>Chicago,<br>Illinois | Cold | 3 months preconception | Weeks 22-28 | 0.84 (0.42, 1.70)        | <b>0.62 (0.42, 0.91)</b> | 0.90 (0.72, 1.12)        |                          |
|                                                         |      |                        | Weeks 1-7   | <b>1.40 (1.08, 1.81)</b> | 1.12 (0.88, 1.42)        | 1.07 (0.94, 1.21)        |                          |
|                                                         |      |                        | Weeks 8-14  | 1.03 (0.80, 1.31)        | 0.96 (0.76, 1.21)        | 0.96 (0.84, 1.08)        |                          |
|                                                         |      |                        | Weeks 15-21 | <b>1.64 (1.21, 2.23)</b> | 1.01 (0.79, 1.30)        | 1.01 (0.88, 1.16)        |                          |
|                                                         |      |                        | Weeks 22-28 | 0.82 (0.61, 1.11)        | 0.87 (0.68, 1.11)        | 0.88 (0.77, 1.00)        |                          |
|                                                         |      |                        | Hot         | 3 months preconception   | 1.05 (0.77, 1.43)        | 1.12 (0.85, 1.46)        | 1.07 (0.93, 1.23)        |
|                                                         |      |                        | Weeks 1-7   | 0.83 (0.62, 1.10)        | 0.89 (0.70, 1.13)        | 0.99 (0.87, 1.13)        |                          |
|                                                         |      |                        | Weeks 8-14  | 0.82 (0.61, 1.10)        | 0.93 (0.70, 1.24)        | 0.99 (0.85, 1.15)        |                          |
|                                                         |      |                        | Weeks 15-21 | 0.91 (0.68, 1.20)        | 0.88 (0.66, 1.17)        | 0.90 (0.78, 1.04)        |                          |
|                                                         |      |                        | Weeks 22-28 | 1.10 (0.83, 1.46)        | 1.07 (0.82, 1.38)        | 1.11 (0.97, 1.27)        |                          |
| 11-University<br>of Miami,<br>Florida                   | Cold | 3 months preconception | Weeks 1-7   | 1.05 (0.80, 1.37)        | 0.89 (0.72, 1.11)        | <b>0.86 (0.77, 0.96)</b> |                          |
|                                                         |      |                        | Weeks 8-14  | 0.94 (0.73, 1.21)        | 1.12 (0.90, 1.38)        | 1.01 (0.90, 1.12)        |                          |
|                                                         |      |                        | Weeks 8-14  | 1.02 (0.79, 1.31)        | 0.84 (0.68, 1.05)        | 0.90 (0.81, 1.01)        |                          |

|                                     |      |                        |                          |                          |                          |
|-------------------------------------|------|------------------------|--------------------------|--------------------------|--------------------------|
|                                     |      | Weeks 15-21            | 1.07 (0.79, 1.46)        | 1.01 (0.79, 1.28)        | 0.95 (0.84, 1.08)        |
|                                     |      | Weeks 22-28            | 1.17 (0.89, 1.53)        | 1.01 (0.83, 1.24)        | 1.03 (0.93, 1.15)        |
|                                     | Hot  | 3 months preconception | 1.19 (0.89, 1.57)        | 1.09 (0.86, 1.38)        | 0.99 (0.88, 1.12)        |
|                                     |      | Weeks 1-7              | 0.96 (0.75, 1.24)        | 1.12 (0.91, 1.38)        | 1.00 (0.90, 1.12)        |
|                                     |      | Weeks 8-14             | 1.13 (0.86, 1.47)        | 1.13 (0.92, 1.38)        | 1.04 (0.93, 1.16)        |
|                                     |      | Weeks 15-21            | <b>1.36 (1.05, 1.75)</b> | <b>1.48 (1.20, 1.81)</b> | <b>1.23 (1.10, 1.37)</b> |
|                                     |      | Weeks 22-28            | 1.04 (0.77, 1.40)        | 1.26 (0.99, 1.61)        | 1.02 (0.91, 1.14)        |
| 12-University<br>of Texas,<br>Texas | Cold | 3 months preconception | 1.08 (0.88, 1.33)        | 1.02 (0.87, 1.20)        | 0.96 (0.90, 1.03)        |
|                                     |      | Weeks 1-7              | 1.12 (0.92, 1.36)        | 0.87 (0.75, 1.01)        | 0.98 (0.92, 1.04)        |
|                                     |      | Weeks 8-14             | 1.05 (0.86, 1.28)        | <b>0.81 (0.69, 0.94)</b> | <b>0.91 (0.86, 0.98)</b> |
|                                     |      | Weeks 15-21            | 1.00 (0.81, 1.22)        | 0.97 (0.83, 1.13)        | 0.96 (0.90, 1.02)        |
|                                     |      | Weeks 22-28            | 1.05 (0.84, 1.33)        | 0.88 (0.75, 1.03)        | 0.95 (0.88, 1.01)        |
|                                     | Hot  | 3 months preconception | 1.07 (0.85, 1.35)        | 1.03 (0.86, 1.23)        | 0.99 (0.92, 1.07)        |
|                                     |      | Weeks 1-7              | 1.12 (0.87, 1.44)        | 0.97 (0.81, 1.15)        | 0.99 (0.92, 1.06)        |
|                                     |      | Weeks 8-14             | 0.89 (0.67, 1.18)        | 0.88 (0.73, 1.07)        | 0.95 (0.89, 1.03)        |
|                                     |      | Weeks 15-21            | 0.99 (0.80, 1.23)        | <b>1.21 (1.02, 1.43)</b> | <b>1.07 (1.00, 1.14)</b> |
|                                     |      | Weeks 22-28            | 1.13 (0.90, 1.42)        | 0.92 (0.77, 1.10)        | 0.99 (0.92, 1.07)        |

Bold face indicates statistical significance at  $\alpha < 0.05$ . Models were adjusted for month of conception.

Abbreviations: aRR, adjusted relative risk; CI, confidence interval

Table S6. Adjusted relative risk of preterm birth associated with extreme whole pregnancy temperature up to week of delivery.

| Week of delivery | RR <sup>a</sup> (95% CI) |                          | Delivered | n                   |         |
|------------------|--------------------------|--------------------------|-----------|---------------------|---------|
|                  | Cold                     | Hot                      |           | Ongoing pregnancies |         |
| 23               | 1.02 (0.64, 1.62)        | 1.32 (0.84, 2.08)        | 416       |                     | 222,959 |
| 24               | 0.98 (0.66, 1.47)        | 1.37 (0.93, 2.02)        | 496       |                     | 222,463 |
| 25               | 1.26 (0.85, 1.87)        | 1.04 (0.66, 1.63)        | 464       |                     | 221,999 |
| 26               | 1.29 (0.90, 1.85)        | 1.37 (0.89, 2.11)        | 475       |                     | 221,524 |
| 27               | 1.01 (0.72, 1.42)        | 0.88 (0.58, 1.33)        | 515       |                     | 221,009 |
| 28               | 0.97 (0.68, 1.39)        | 1.46 (0.99, 2.14)        | 576       |                     | 220,433 |
| 29               | 0.92 (0.65, 1.30)        | 0.87 (0.61, 1.25)        | 695       |                     | 219,738 |
| 30               | 1.17 (0.89, 1.53)        | 1.28 (0.92, 1.78)        | 860       |                     | 218,878 |
| 31               | 0.97 (0.74, 1.28)        | 0.77 (0.55, 1.08)        | 1,026     |                     | 217,852 |
| 32               | 1.00 (0.79, 1.26)        | 1.10 (0.86, 1.42)        | 1,395     |                     | 216,457 |
| 33               | 0.99 (0.81, 1.20)        | 0.91 (0.73, 1.15)        | 1,849     |                     | 214,608 |
| 34               | 0.96 (0.82, 1.12)        | <b>1.21 (1.01, 1.44)</b> | 2,948     |                     | 211,660 |
| 35               | 1.00 (0.88, 1.13)        | 1.08 (0.94, 1.24)        | 4,759     |                     | 206,901 |
| 36               | 0.99 (0.91, 1.08)        | <b>1.16 (1.06, 1.28)</b> | 9,656     |                     | 197,245 |
| 37               | <b>0.93 (0.88, 0.98)</b> | <b>1.08 (1.01, 1.15)</b> | 21,032    |                     | 176,213 |
| 38               | <b>0.94 (0.91, 0.97)</b> | <b>1.06 (1.02, 1.10)</b> | 45,548    |                     | 130,665 |

Bold face indicates statistical significance at alpha<0.05

Abbreviations: RR, relative risk; CI, confidence interval

<sup>a</sup> Model adjusted for all covariates in Table 1, humidity, and study site.
